# Supplementary material for: Abrogation of HnRNP L enhances anti-PD-1 therapy efficacy via diminishing PD-L1 and promoting CD8+ T cell-mediated ferroptosis in castration-resistant prostate cancer
Source: PubMed Central journal article supplement — Acta Pharm Sin B. 2021 Jul 21;12(2):692–707. doi: 10.1016/j.apsb.2021.07.016 (PMC8897216; doi:10.1016/j.apsb.2021.07.016), 2021-07-21

Supporting Information for

Original article

**Abrogation of HnRNP L enhances anti-PD-1 therapy efficacy  
via diminishing PD-L1 and promoting CD8<sup>+</sup> T cell-mediated  
ferroptosis in castration-resistant prostate cancer**

Xumin Zhou<sup>a,†</sup>, Libin Zou<sup>a,†</sup>, Hangyu Liao<sup>b,†</sup>, Junqi Luo<sup>a</sup>, Taowei Yang<sup>a</sup>, Jun Wu<sup>a</sup>,  
Wenbin Chen<sup>a</sup>, Kaihui Wu<sup>a</sup>, Shengren Cen<sup>a</sup>, Daojun Lv<sup>d</sup>, Fangpeng Shu<sup>e</sup>, Yu Yang<sup>f</sup>,  
Chun Li<sup>c,\*</sup>, Bingkun Li<sup>a,\*</sup>, Xiangming Mao<sup>a,\*</sup>

<sup>a</sup>*Department of Urology, Zhujiang Hospital, Southern Medical University, Guangzhou 510280, China*

<sup>b</sup>*Second Department of Hepatobiliary Surgery, Zhujiang Hospital, Southern Medical University, Guangzhou 510280, China*

<sup>c</sup>*Nursing Department, Nanfang Hospital, Southern Medical University, Guangzhou 510515, China*

<sup>d</sup>*Department of Urology, Minimally Invasive Surgery Center, the First Affiliated Hospital of Guangzhou Medical University, Guangzhou 510120, China*

<sup>e</sup>*Department of Urology, Guangzhou Women and Children's Medical Center, Guangzhou Medical University, Guangzhou 510623, China*

<sup>f</sup>*Department of Urology, Peking University Shenzhen Hospital, Shenzhen 518036, China*

Received 12 May 2021; received in revised form 20 June 2021; accepted 9 July 2021

\*Corresponding authors. Tel.: +86 20 62782725; fax: +86 20 62782725.

E-mail addresses: 120601847@qq.com (Chun Li); 25840416@qq.com (Bingkun Li); mxm@smu.edu.cn (Xiangming Mao).

<sup>†</sup>These authors made equal contributions to this work.

**Running title:** Abrogation of HnRNP L enhances anti-PD-1 therapy efficacy

**Table S1** Primer sequences for qRT-PCR.

| Primers                | Sequences 5'→3'          |
|------------------------|--------------------------|
| Human <i>HNRNPL</i> -F | TTGTGGCCCTGTCCAGAGAATT   |
| Human <i>HNRNPL</i> -R | GTTTGTGTAGTCCCAAGTATCCTG |
| Mouse <i>Hnrnpl</i> -F | TGGCAGTAACCCCAACAAAC     |
| Mouse <i>Hnrnpl</i> -R | CATCATGGTAATGGCTGTGGT    |
| Human <i>CD274</i> -F  | GCTCCAAAGGACTTGTACGTG    |
| Human <i>CD274</i> -R  | TGATCTGAAGGGCAGCATTTC    |
| Mouse <i>Cd274</i> -F  | GCTCCAAAGGACTTGTACGTG    |
| Mouse <i>Cd274</i> -R  | TGATCTGAAGGGCAGCATTTC    |
| Mouse <i>Gapdh</i> -F  | AGAAGGTGGTGAAGCAGGCATC   |
| Mouse <i>Gapdh</i> -R  | CGAAGGTGGAAGAGTGGGAGTTG  |
| Human <i>GAPDH</i> -F  | AGAAGGCTGGGGCTCATTG      |
| Human <i>GAPDH</i> -R  | AGGGGCCATCCACAGTCTTC     |

**Figure S1** For Fig. 1F-Normal

5 ×

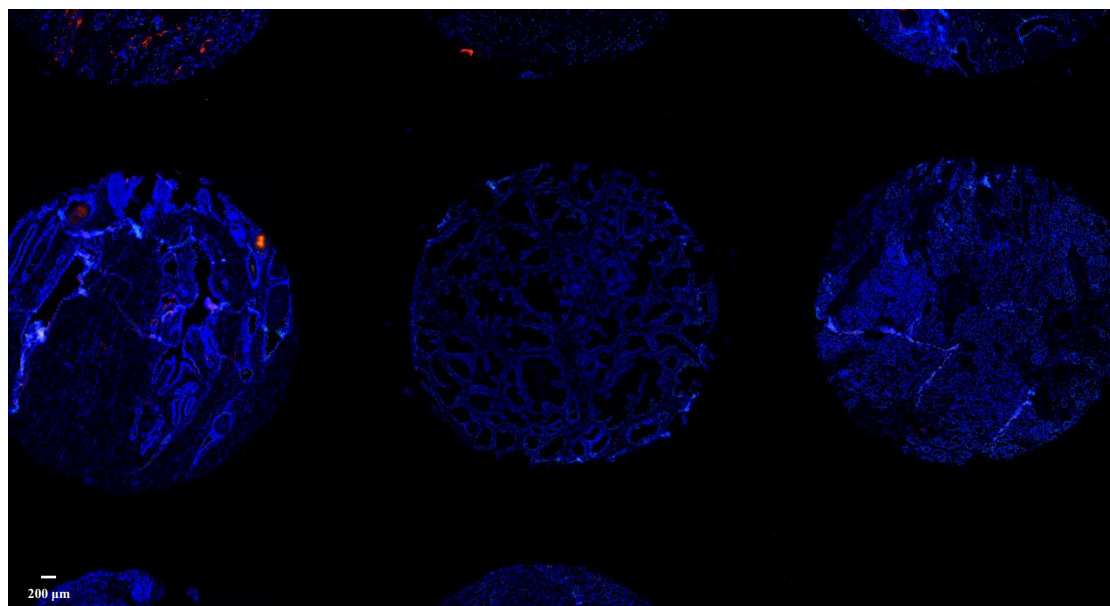

20 ×

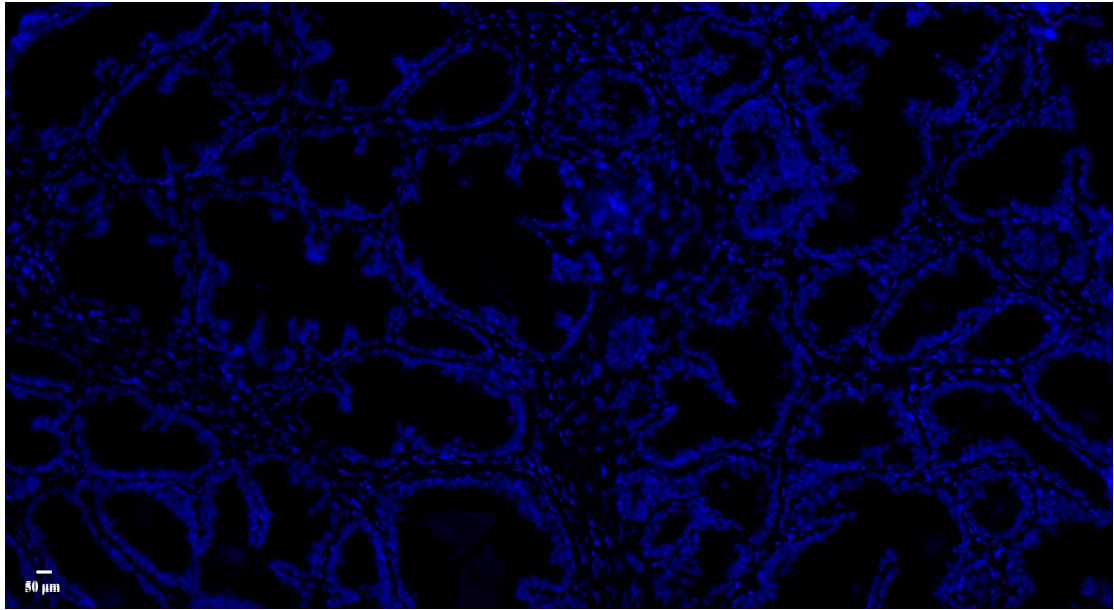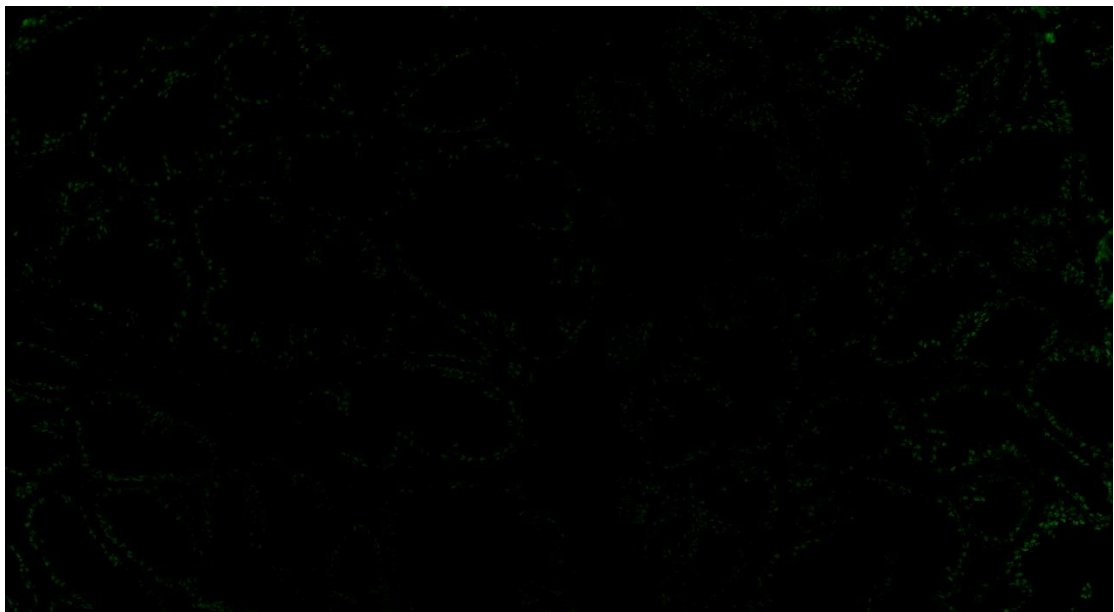

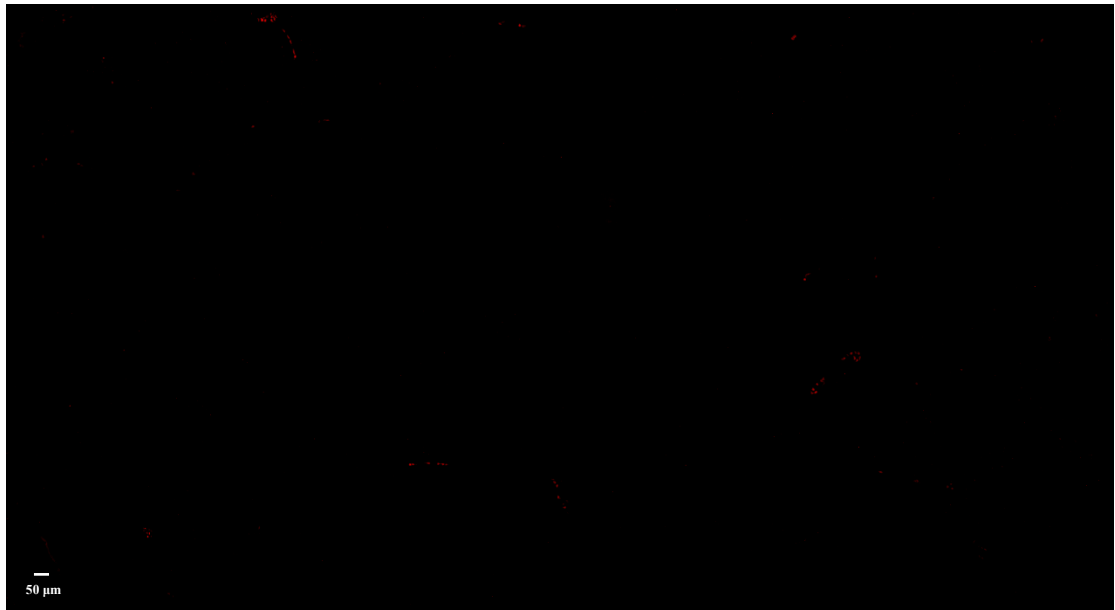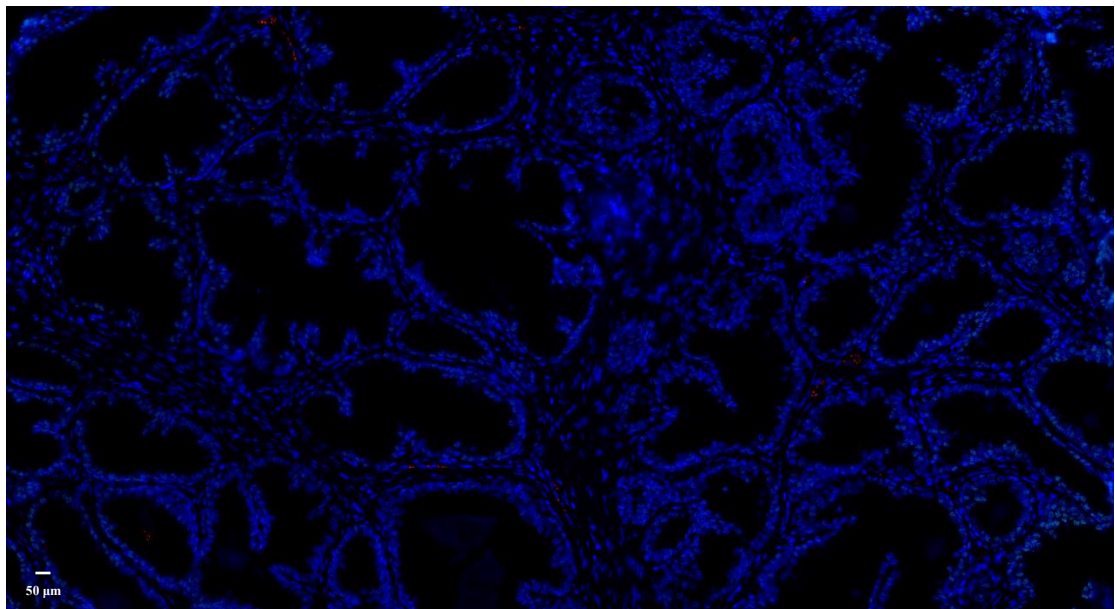

For Fig. 1F-Tumor 1

5 ×

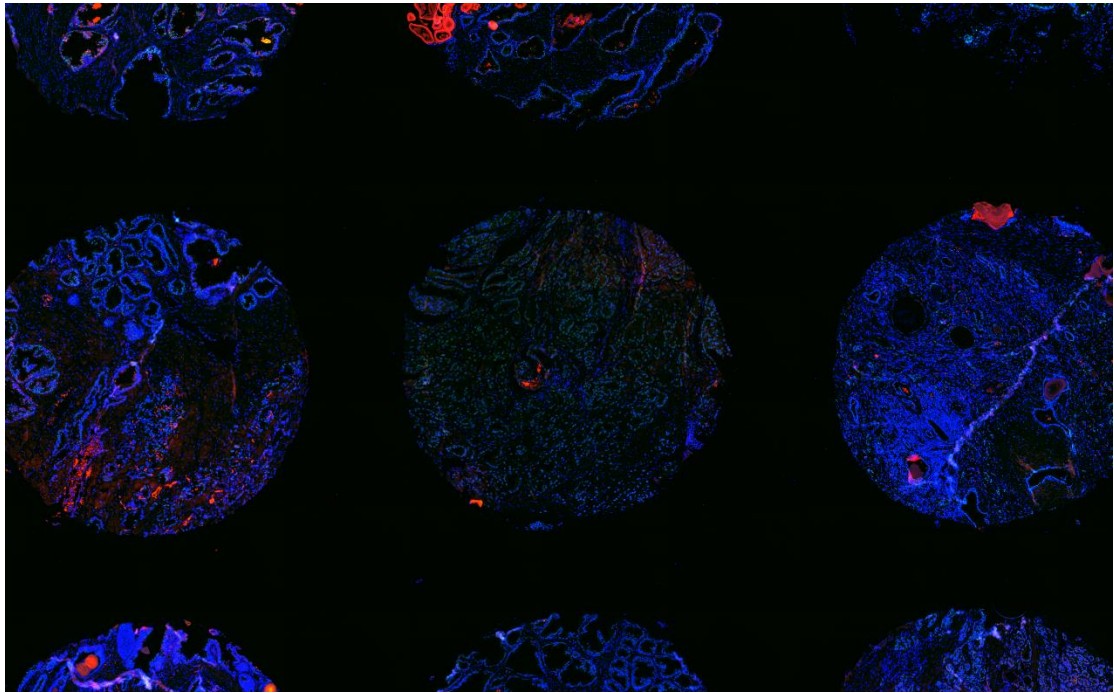

20 ×

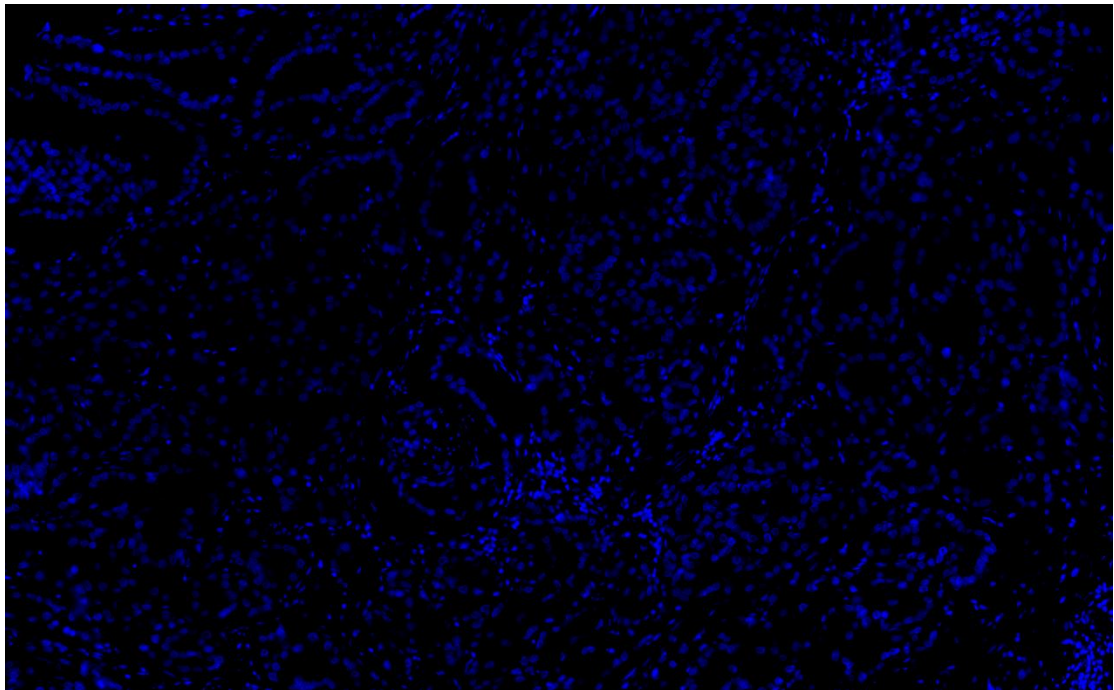

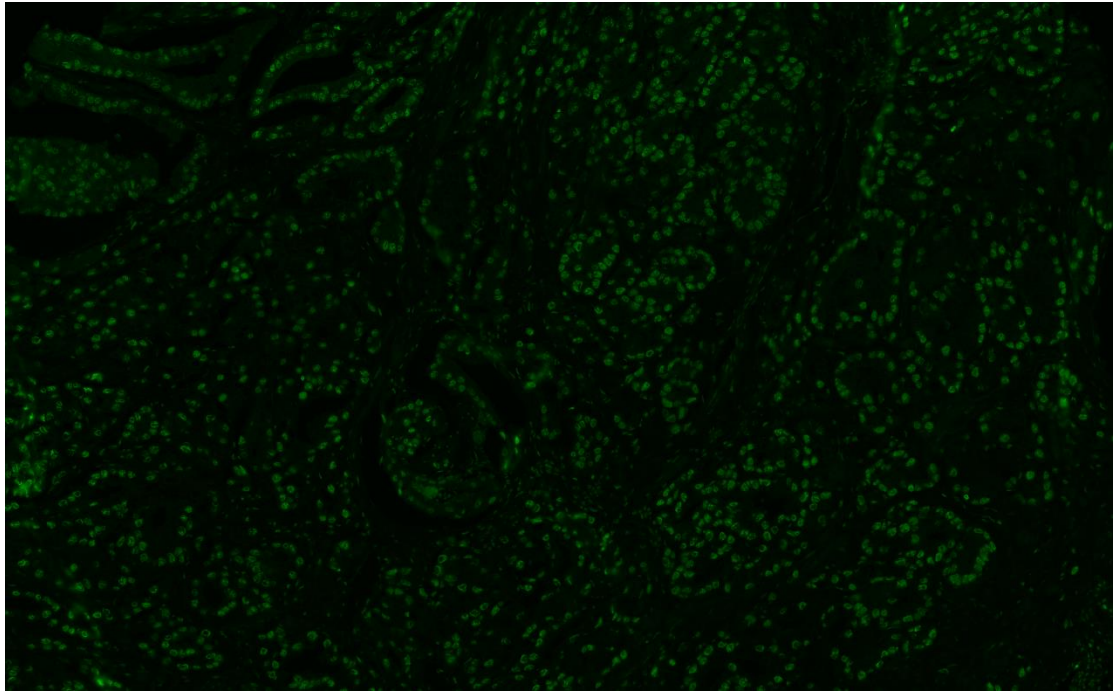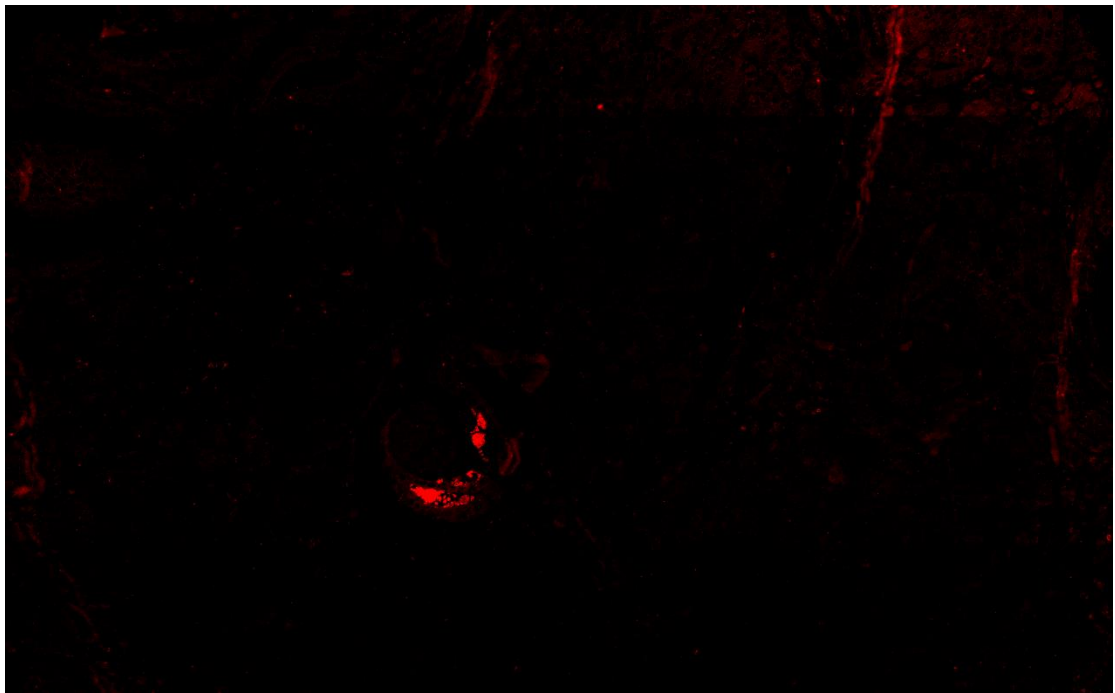

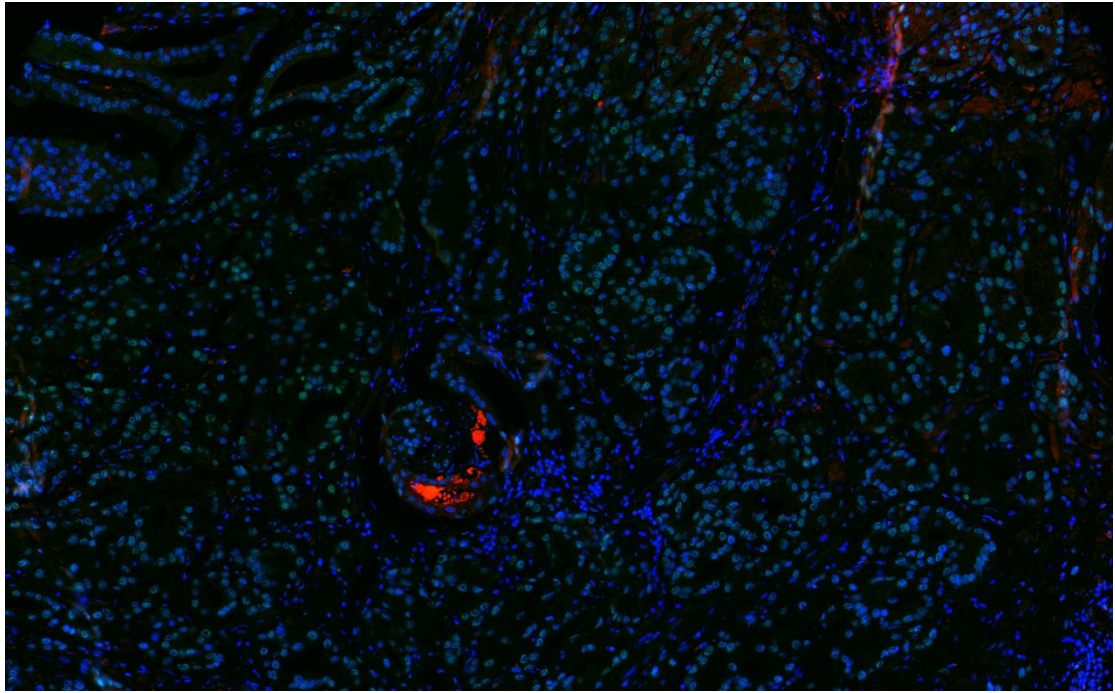

For Fig. 1F-Tumor 2

5 ×

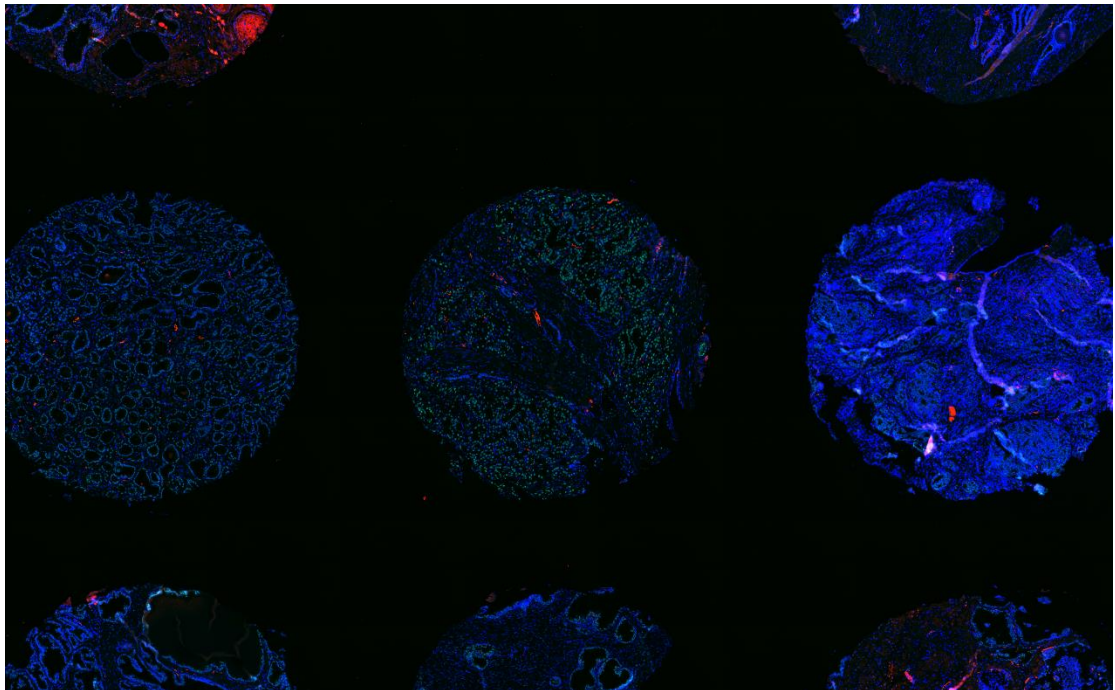

20 ×

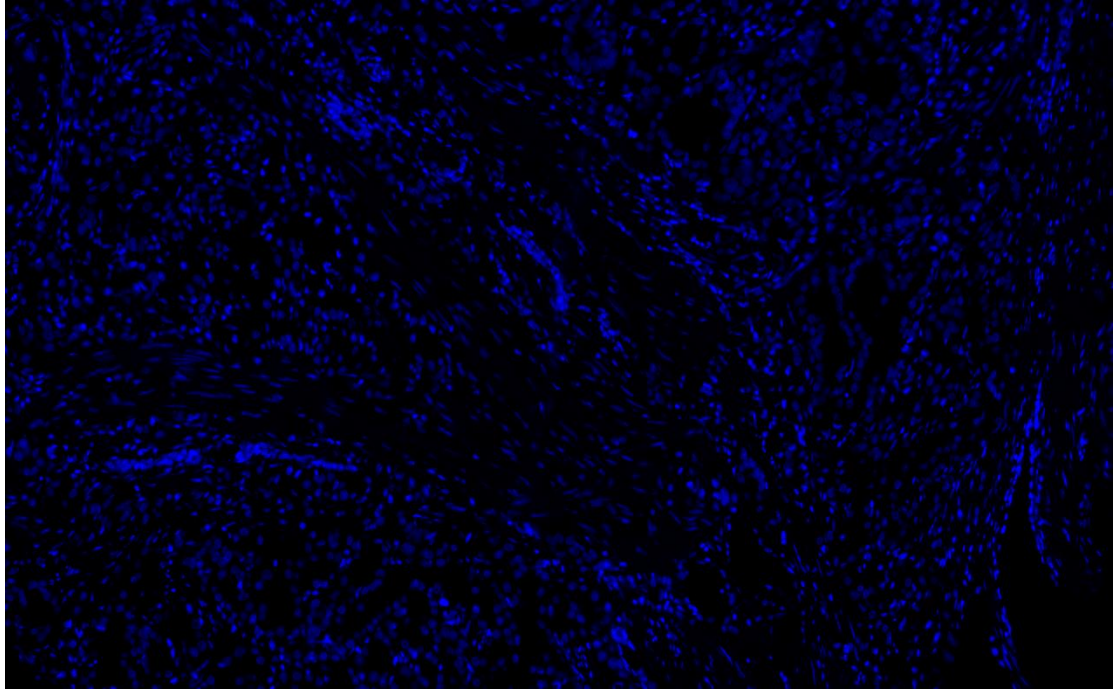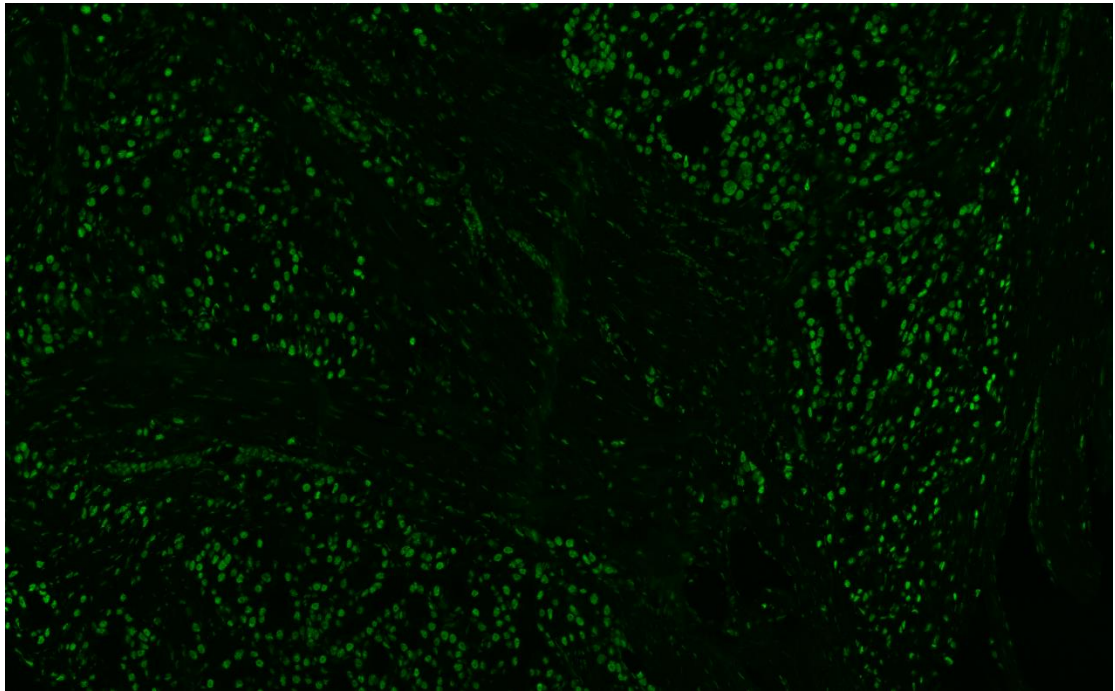



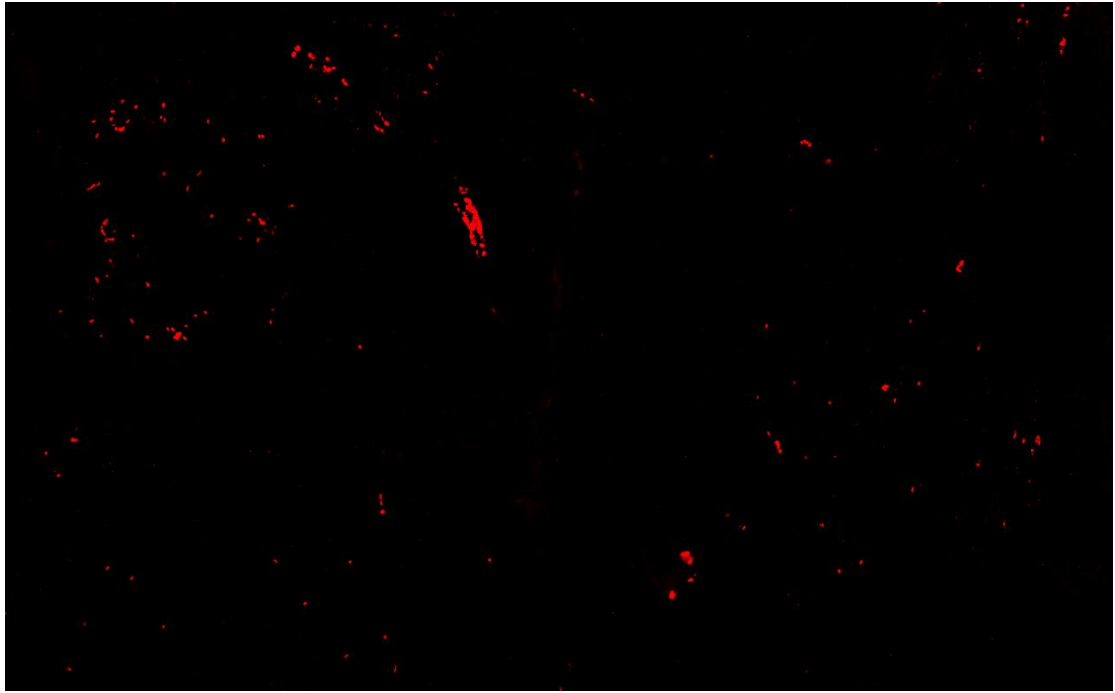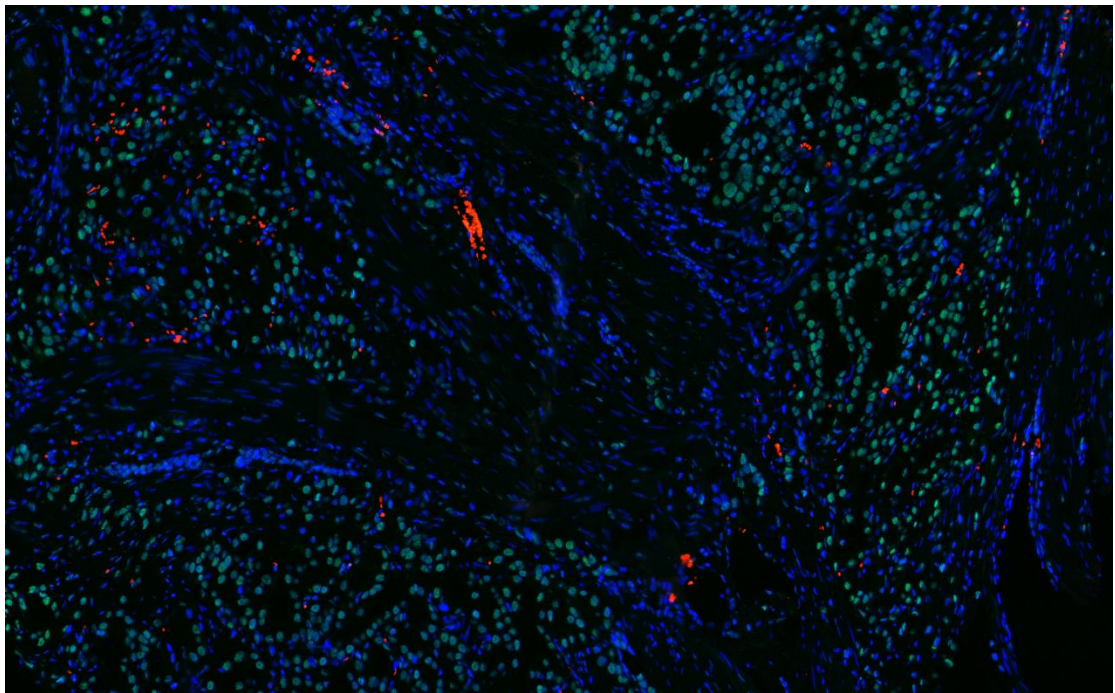

For Fig. 1F-Tumor 3

5 ×

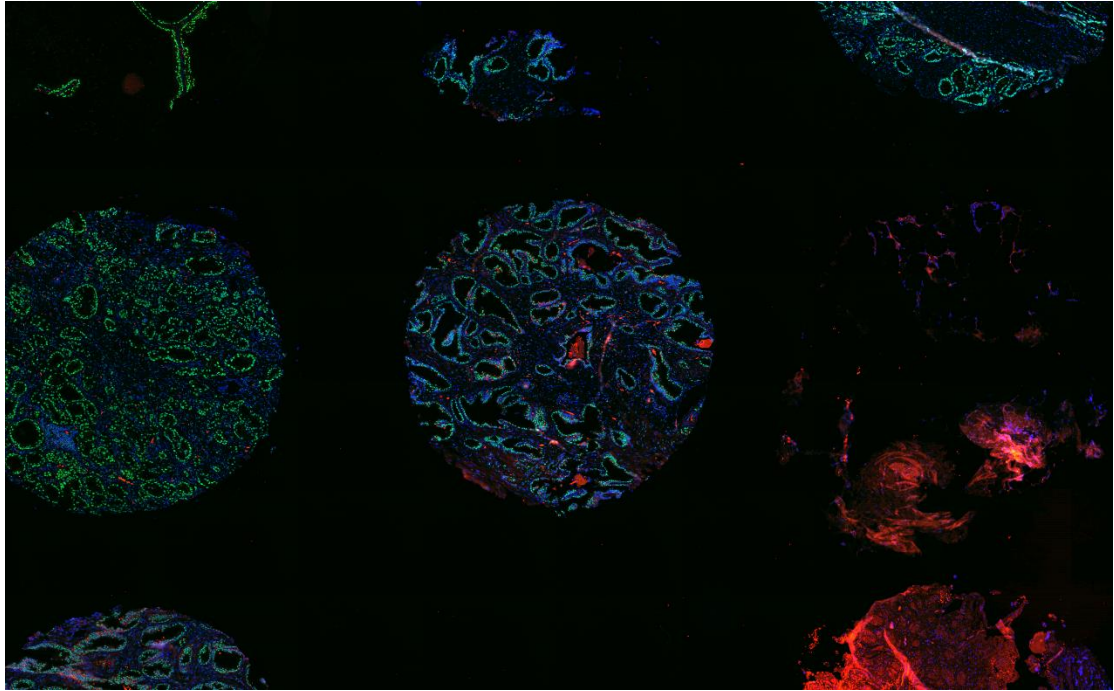

20 ×

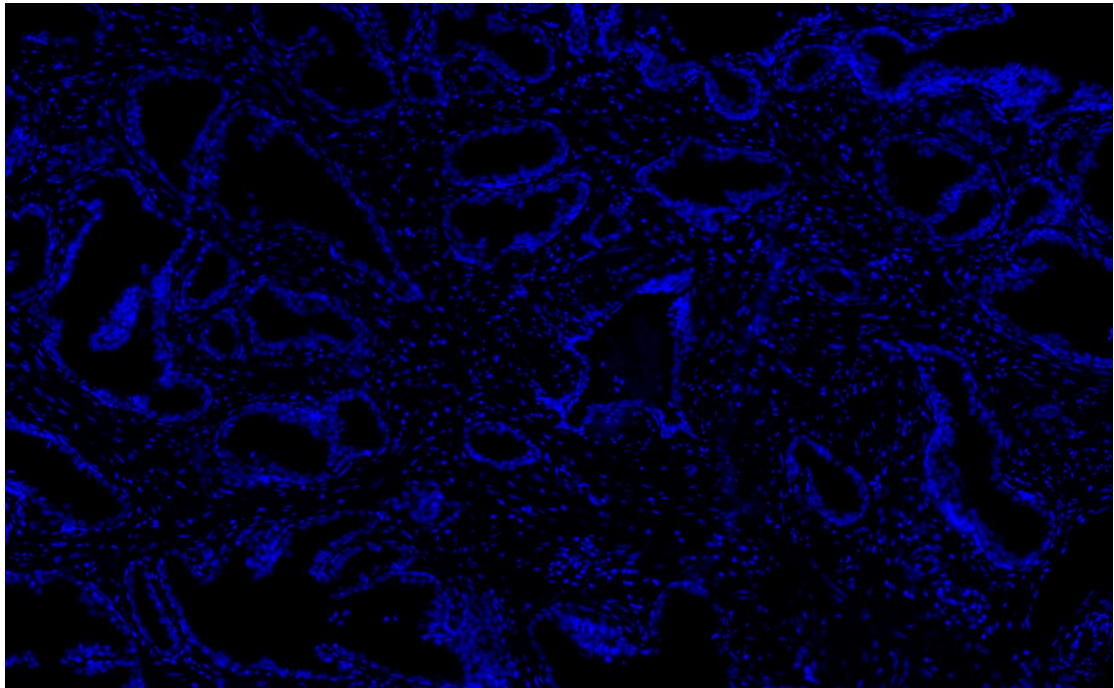

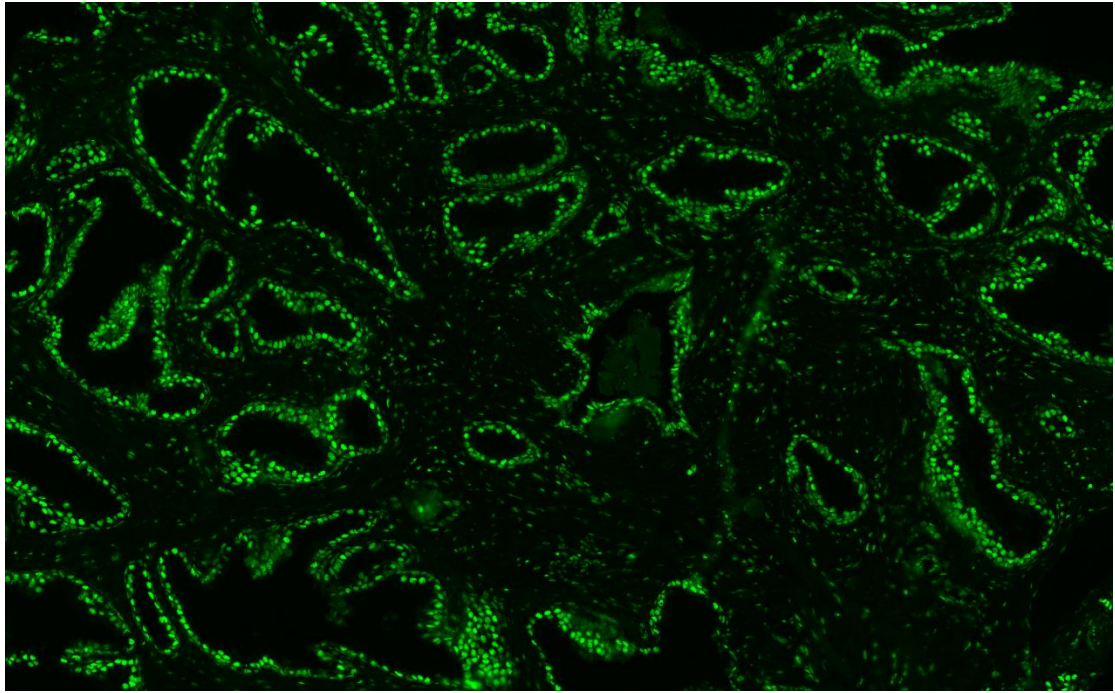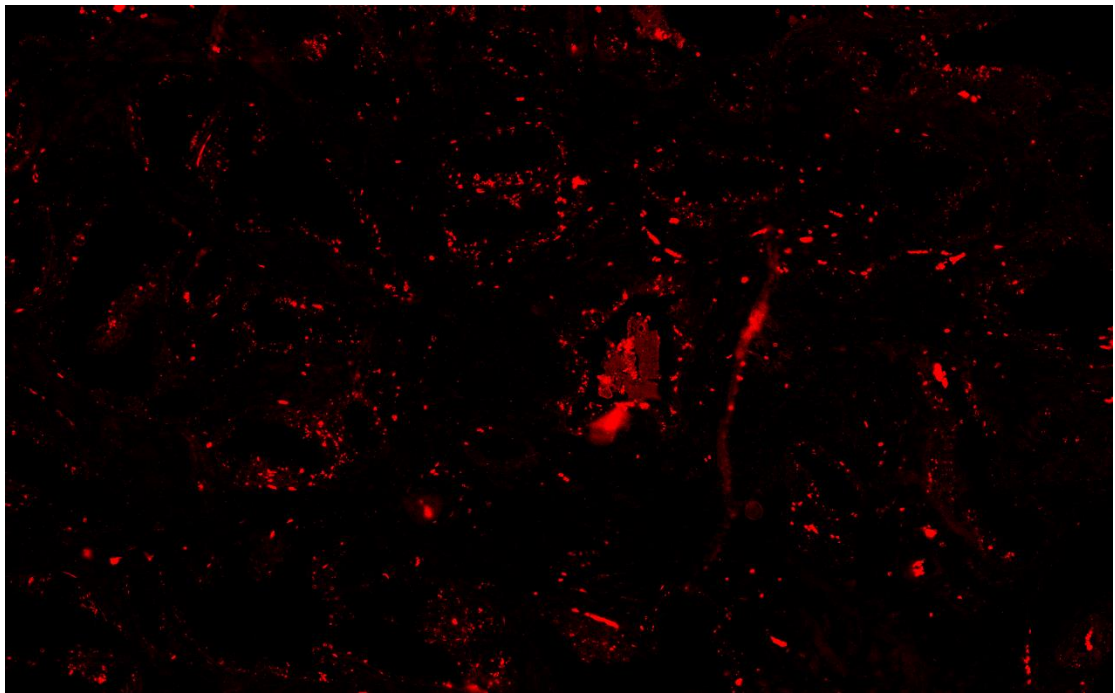

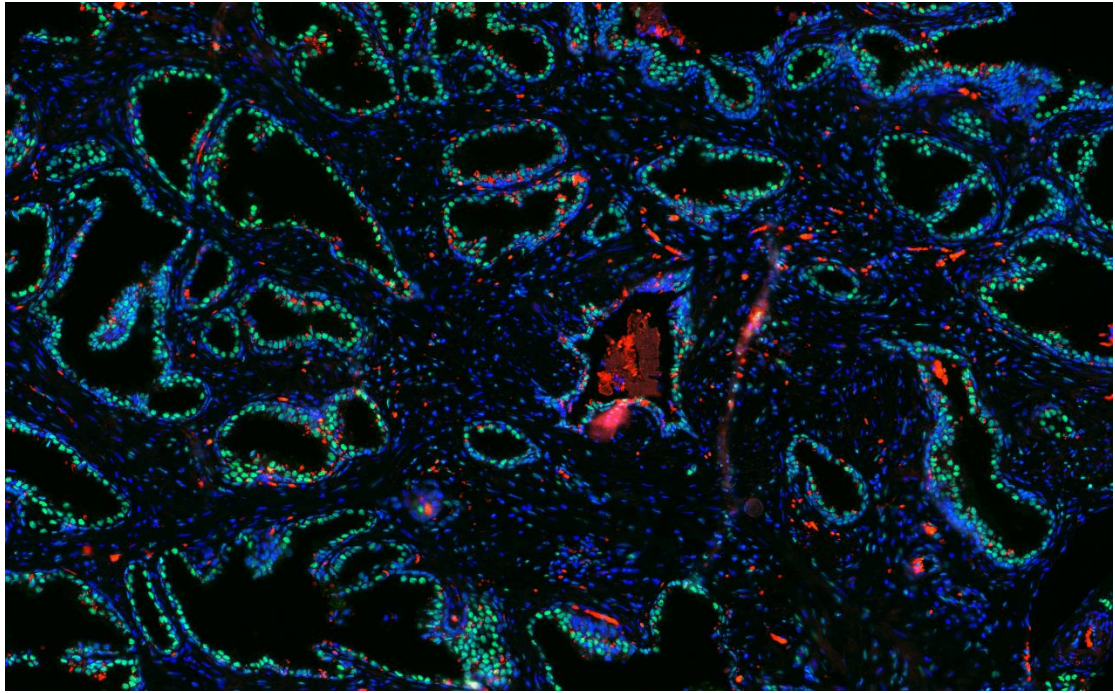

Supplement: mmc1.pdf [file mmc1.pdf]
